# Supplementary material for: Linking indirect effects of cytomegalovirus in transplantation to modulation of monocyte innate immune function
Source: PubMed Central journal article supplement (PMC7176434; doi:10.1126/sciadv.aax9856), 2020-04-22
Supplement: aax9856_SM.pdf [file aax9856_SM.pdf]

[advances.sciencemag.org/cgi/content/full/6/17/eaax9856/DC1](https://advances.sciencemag.org/cgi/content/full/6/17/eaax9856/DC1)

## Supplementary Materials for

### **Linking indirect effects of cytomegalovirus in transplantation to modulation of monocyte innate immune function**

Pritha Sen, Adrian R. Wilkie, Fei Ji, Yiming Yang, Ian J. Taylor, Miguel Velazquez-Palafox, Emilia A. H. Vanni, Jean M. Pesola, Rosio Fernandez, Han Chen, Liza M. Morsett, Erik R. Abels, Mary Piper, Rebekah J. Lane, Suzanne E. Hickman, Terry K. Means, Eric S. Rosenberg, Ruslan I. Sadreyev, Bo Li, Donald M. Coen, Jay A. Fishman, Joseph El Khoury\*

\*Corresponding author. Email: [jelkhoury@mgh.harvard.edu](mailto:jelkhoury@mgh.harvard.edu)

Published 22 April 2020, *Sci. Adv.* **6**, eaax9856 (2020)  
DOI: 10.1126/sciadv.aax9856

#### **The PDF file includes:**

Figs. S1 to S6  
Tables S1 and S2  
Legends for tables S3 to S7 and S9  
Table S8

#### **Other Supplementary Material for this manuscript includes the following:**

(available at [advances.sciencemag.org/cgi/content/full/6/17/eaax9856/DC1](https://advances.sciencemag.org/cgi/content/full/6/17/eaax9856/DC1))

Tables S3 to S7 and S9

## Supplementary Materials

**Supplemental Table 1.** Enriched pathways (MSigDB Hallmarks) in CMV-infected monocytes.

**Supplemental Table 2.** Enriched pathways (InnateDB) in CMV-infected monocytes.

**Supplemental Table 3.** Subcategorization of 154 unique GSEA pathways with significant normalized enrichment scores (NES) dysregulated in CMV-infected monocytes by immunological and/or biological function into “Summary” chord terms.

**Supplemental Table 4.** Differential gene expression table (log fold-change, FDR, CPM) for each detected transcript within CMV-infected CD14<sup>+</sup>/16<sup>-</sup> and CD14<sup>+</sup>/16<sup>+</sup> monocytes compared to mock-infected CD14<sup>+</sup>/16<sup>-</sup> and CD14<sup>+</sup>/16<sup>+</sup>.

**Supplemental Table 5.** Differential gene expression table (log fold-change, FDR, CPM) in CD14<sup>+</sup>/16<sup>-</sup> monocytes infected with live and UV-inactivated CMV. Comparisons between non-UV inactivated CMV (Live) and CMV subject to 10 (UV<sup>TC10</sup>) and 60 (UV<sup>TC60</sup>) minutes of direct UV light as compared to mock-infected monocytes are included.

**Supplemental Table 6.** Copies of GFP mRNA identified by bulk RNA-Seq in mock-, CMV- and UV-inactivated CMV-infected monocytes.

**Supplemental Table 7.** Differential gene expression table (log fold-change, FDR, CPM) of GFP and key host genes in mock, 10' and 60' UV-inactivated and live CMV-infected CD14<sup>+</sup>/16<sup>-</sup> monocytes.

**Supplemental Table 8.** Percent fold change of key host genes in CD14<sup>+</sup> monocytes isolated from heart transplant recipients during detection of high versus low/undetectable CMV viral load. For comparison, directionality of expression (+ increased expression, - decreased expression) from our *in vitro* model is concurrently shown.

**Supplemental Table 9.** Differential gene expression table (log fold-change, percent fold-change, WAD score, Fisher q value) in CD14<sup>+</sup> monocytes isolated at high and low CMV viremia from cardiac transplant recipients CT00A, CT00B, CT00C, and CT00D.

**Supplemental Fig 1.** CMV-infected CD14<sup>+</sup>/16<sup>-</sup>/HLA-DR<sup>+</sup>/GFP<sup>+</sup> circulating dendritic cells were identified by flow cytometry in this *in vitro* model of CMV infection.

**Supplemental Fig 2.** RNA-Seq was performed on calcein<sup>+</sup>/CD3/19/20/56<sup>-</sup>/CD14<sup>+</sup>/16<sup>-</sup> and CD14<sup>+</sup>/16<sup>-</sup> cells from mock-infected PBMC and CD14<sup>+</sup>/16<sup>-</sup>/GFP<sup>+</sup> and CD14<sup>+</sup>/16<sup>+</sup>/GFP<sup>+</sup> cells from CMV-infected PBMC from ten unique immunocompetent donors. Mock and CMV-GFP<sup>+</sup> infected monocytes cluster in distinct populations as shown by **A**, correlation heatmap and **B**, PCA plot. **C**, One specimen from the mock-infected CD14<sup>+</sup>/16<sup>-</sup> monocyte group (31F) was excluded based on having a lower number of CPM reads compared to all other mock specimens and two specimens from the CMV-infected CD14<sup>+</sup>/16<sup>-</sup> monocyte group (27F, 33F, open black circles) were also excluded from the final analysis as they were relative outliers on PCA plot and **D**, found to have 10-fold greater number of copies of viral RNA and GFP compared to other biological replicates.

**Supplemental Fig 3.** Of the 38 CMV-associated viral transcripts detected in GFP<sup>+</sup> TB40/E-5 infected monocytes, 23 (60%) belonged to immediate-early and delayed-early families of transcripts and 12 (30%) belonged to the late family of transcripts. Immediate early (IE), delayed early (DE), leaky late (LL), true late (TL), latent (LAT).

**Supplemental Fig 4.** Chord diagram illustrating that the top 200 differentially expressed transcripts in CMV-infected CD14<sup>+</sup>/16<sup>-</sup> monocytes spanned multiple different cellular compartments in the following distribution: extracellular (60), membrane-associated (67), cytosol (61), nuclear/transcription factor (43), Golgi/ER-phagolysosome (16), mitochondria (7), cytoskeleton (3) and lipoprotein (3).

**Supplemental Fig 5.** Percent of monocytes capable of phagocytosing pHrodo-red labeled *C. albicans* and *C. neoformans* as measured by conventional flow cytometry. There was a significant decrease in the overall percentage of CMV-infected monocytes phagocytosing pHrodo-labeled *C. neoformans* (Cn) (p value 0.01, paired t-test) but no significant difference in the overall percentage of monocytes actively phagocytosing pHrodo-red labeled *C. albicans* (Ca) (p value 0.54, paired t-test). p values are denoted \*\* = p<0.01]. Nonsignificance was indicated by the letters ns.

**Supplemental Fig 6.** Direct exposure to UV light successfully inactivates TB40/E-5. Quantitative RT-PCR and IHC for GFP and IE1, Western blot for GFP and UL84, and flow cytometry for GFP were performed on HFF infected at MOI of 1 with TB40/E-5 subjected to direct UV light at a distance of 6 inches from UV light source for 60 minutes (UV<sup>TC</sup>) and one pulse of 360 mJ/cm<sup>2</sup> via Stratalinker (UV<sup>SL</sup>). Compared to UV<sup>SL</sup>, UV<sup>TC</sup>-inactivated TB40/E-5 had a) decreased RNA expression levels of GFP and IE1 at 24 hours, b) abrogation of GFP and IE1 protein expression detected by immunohistochemistry at 24 hours and c) absence of GFP and UL84 protein expression detected by Western blot at 24 and 72 hours. d) Flow cytometry of HFF and PBMC infected with UV<sup>TC</sup>-inactivated TB40/E-5 demonstrates absence of GFP<sup>+</sup> HFF; the percentage of GFP<sup>+</sup> monocytes is equivalent in UV<sup>TC</sup>-irradiated and Live-TB40/E-5-infected PBMC, but the GFP MFI in monocytes infected with UV<sup>TC</sup>-inactivated TB40/E-5 was diminished compared to monocytes infected with live virus.

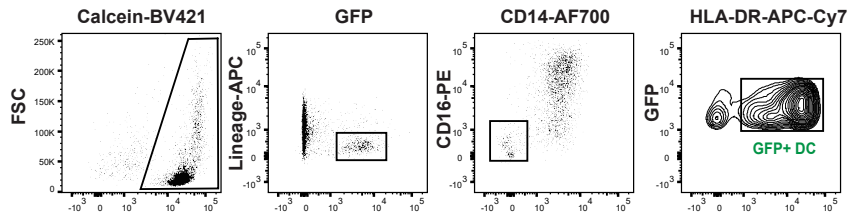

**A**

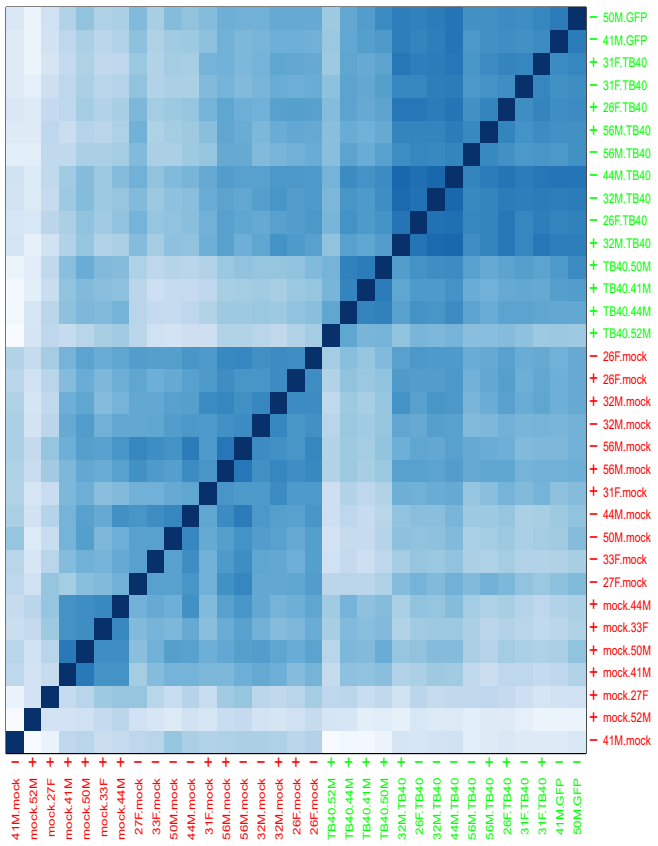

**B**

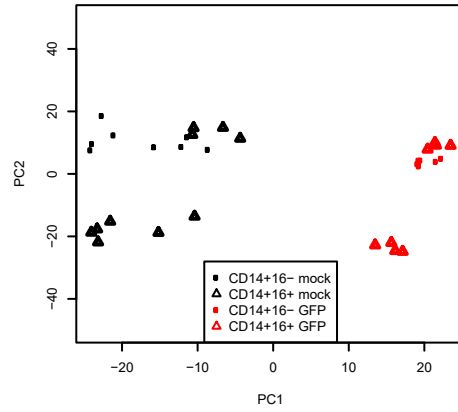

**C**

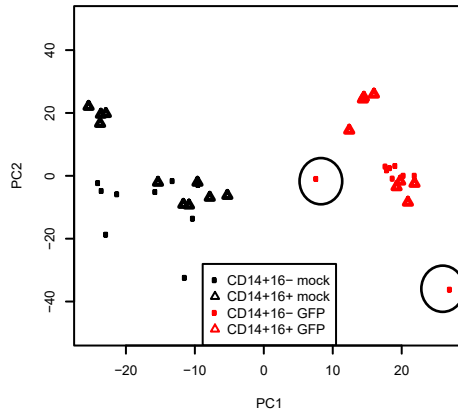

**D**

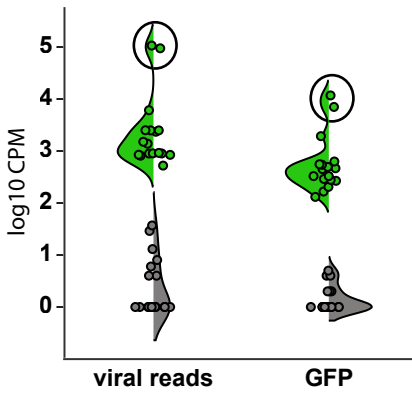

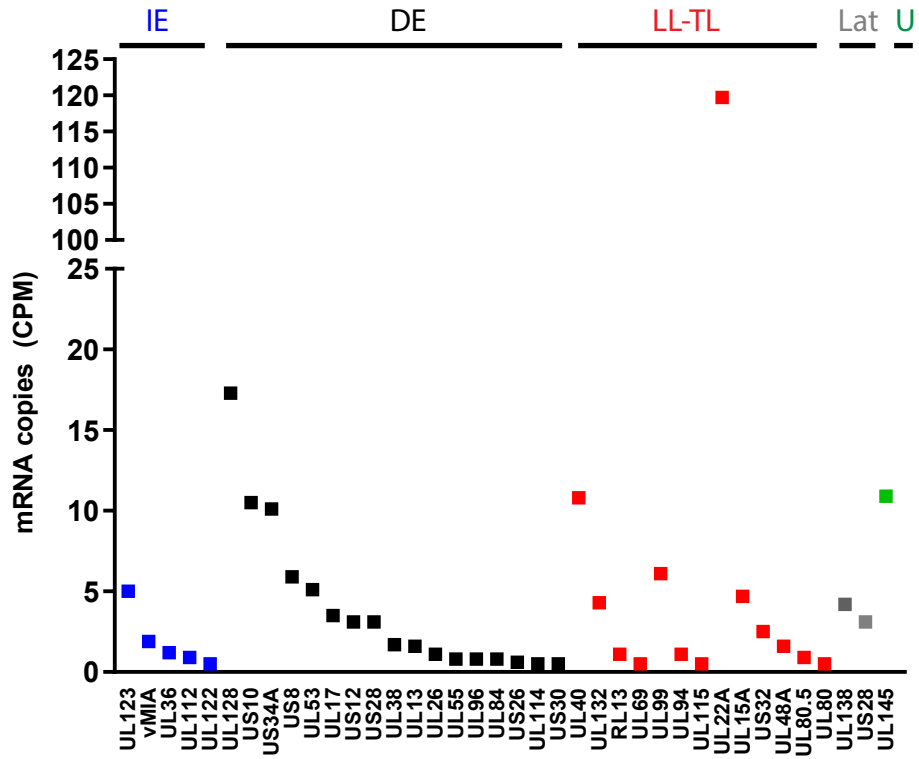

Supplemental Fig.4

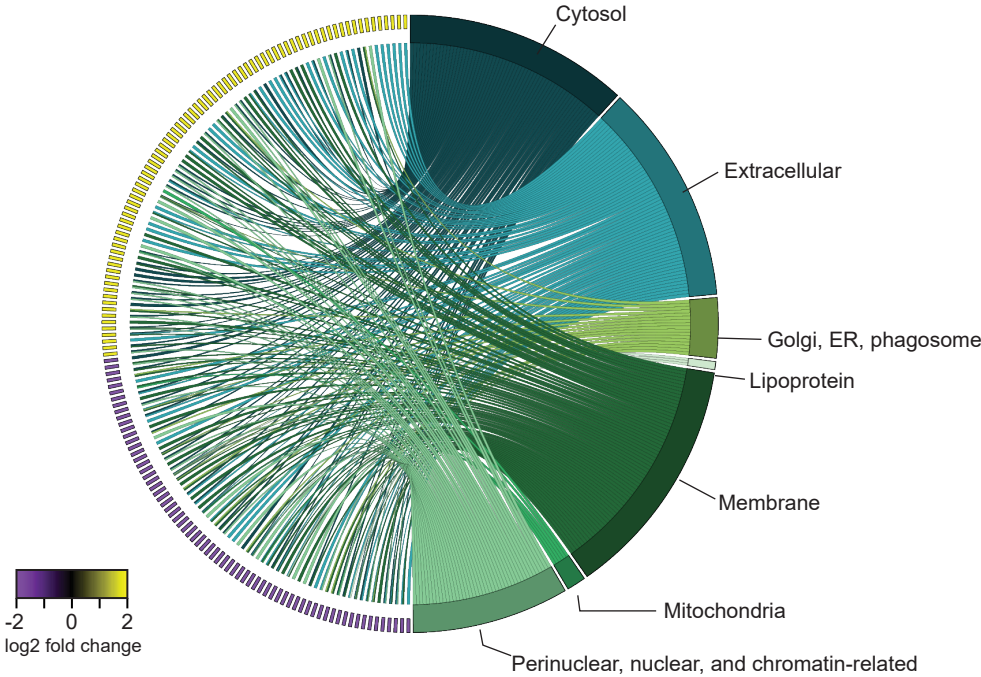

A

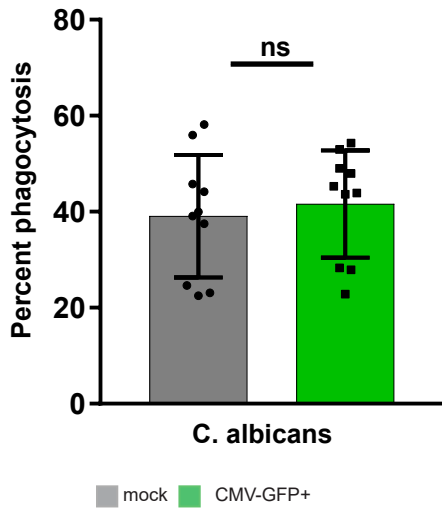

B

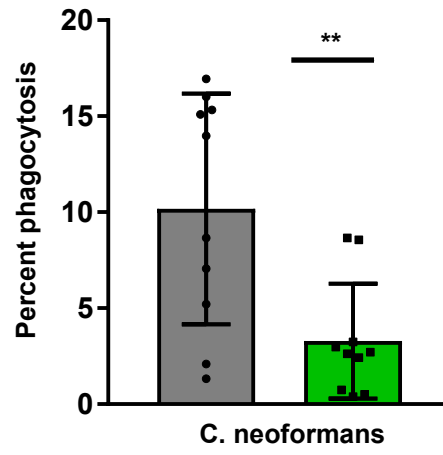



A

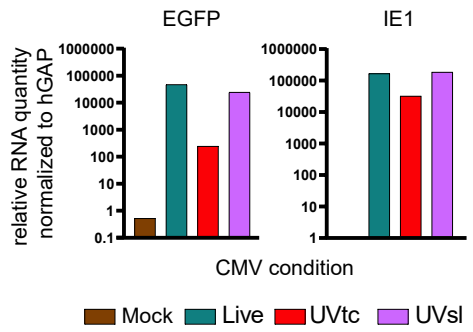

B

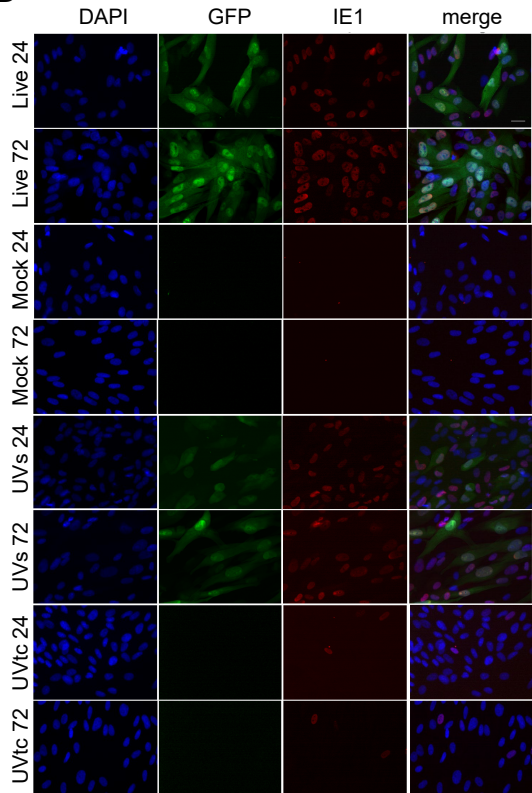

C

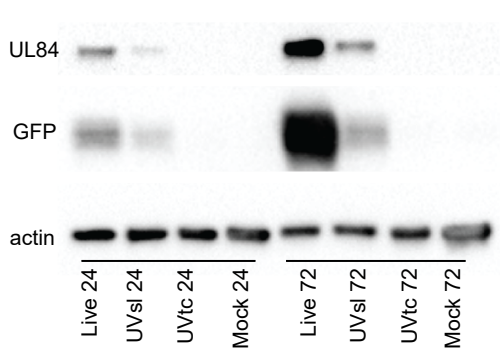

D

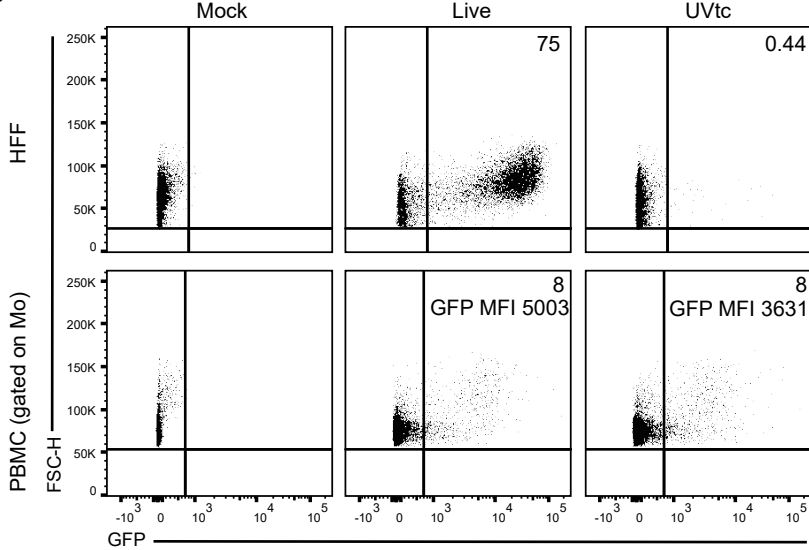

| Pathway Name                       | NES    | FDR q-val |
|------------------------------------|--------|-----------|
| HALLMARK_ADIPOGENESIS              | -2.012 | 0.00E+00  |
| HALLMARK_ALLOGRAFT_REJECTION       | 1.486  | 2.20E-02  |
| HALLMARK_ANDROGEN_RESPONSE         | -1.446 | 4.33E-02  |
| HALLMARK_ANGIOGENESIS              | -2.037 | 0.00E+00  |
| HALLMARK_APICAL_SURFACE            | 1.579  | 1.16E-02  |
| HALLMARK_APOPTOSIS                 | 1.709  | 6.13E-03  |
| HALLMARK_CHOLESTEROL_HOMEOSTASIS   | -1.476 | 3.84E-02  |
| HALLMARK_COAGULATION               | -1.604 | 1.24E-02  |
| HALLMARK_COMPLEMENT                | 1.726  | 5.91E-03  |
| HALLMARK_DNA_REPAIR                | -1.276 | 1.36E-01  |
| HALLMARK_FATTY_ACID_METABOLISM     | -1.706 | 3.86E-03  |
| HALLMARK_GLYCOLYSIS                | -1.351 | 8.54E-02  |
| HALLMARK_IL2_STAT5_SIGNALING       | 1.616  | 1.11E-02  |
| HALLMARK_IL6_JAK_STAT3_SIGNALING   | 1.345  | 5.60E-02  |
| HALLMARK_INFLAMMATORY_RESPONSE     | 2.620  | 0.00E+00  |
| HALLMARK_INTERFERON_ALPHA_RESPONSE | 3.632  | 0.00E+00  |
| HALLMARK_INTERFERON_GAMMA_RESPONSE | 3.846  | 0.00E+00  |
| HALLMARK_KRAS_SIGNALING_DN         | 1.442  | 2.70E-02  |
| HALLMARK_MTORC1_SIGNALING          | -1.777 | 1.69E-03  |
| HALLMARK_MYC_TARGETS_V1            | -2.329 | 0.00E+00  |
| HALLMARK_MYC_TARGETS_V2            | -1.504 | 3.34E-02  |
| HALLMARK_MYOGENESIS                | -1.458 | 4.17E-02  |
| HALLMARK_OXIDATIVE_PHOSPHORYLATION | -2.641 | 0.00E+00  |
| HALLMARK_PEROXISOME                | -2.128 | 0.00E+00  |
| HALLMARK_PI3K_AKT_MTOR_SIGNALING   | -1.501 | 3.12E-02  |
| HALLMARK_TGF_BETA_SIGNALING        | -1.705 | 3.38E-03  |
| HALLMARK_TNFA_SIGNALING_VIA_NFKB   | 2.300  | 0.00E+00  |
| HALLMARK_XENOBIOTIC_METABOLISM     | -1.341 | 8.25E-02  |

| Up | InnateDB Pathway Name                                                     | Pathway | Source       | p-value | p-adj   | Down | InnateDB Pathway Name                                                  | Pathway | Source       | p-value | p-adj   |
|----|---------------------------------------------------------------------------|---------|--------------|---------|---------|------|------------------------------------------------------------------------|---------|--------------|---------|---------|
| UP | FasL/ CD95L signaling                                                     | 13409   | REACTOME     | 4.8E-02 | 2.9E-01 | DOWN | Regulation of KIT signaling                                            | 13324   | REACTOME     | 4.8E-02 | 2.4E-01 |
| UP | Free fatty acid receptors                                                 | 13242   | REACTOME     | 4.8E-02 | 2.9E-01 | DOWN | Signaling by FGFR in disease                                           | 16656   | REACTOME     | 3.4E-02 | 2.1E-01 |
| UP | Apoptotic cleavage of cell adhesion proteins                              | 13416   | REACTOME     | 3.4E-02 | 2.5E-01 | DOWN | Downstream signaling of activated FGFR                                 | 16879   | REACTOME     | 2.8E-02 | 1.9E-01 |
| UP | Direct p53 effectors                                                      | 15209   | PID NCI      | 3.1E-02 | 2.4E-01 | DOWN | VEGFR1 specific signals                                                | 15709   | PID NCI      | 2.1E-02 | 2.1E-01 |
| UP | IL-2 receptor beta chain in T cell activation                             | 4011    | PID BIOCARTA | 2.8E-02 | 2.3E-01 | DOWN | Signaling by EGFR                                                      | 13216   | REACTOME     | 2.0E-02 | 2.1E-01 |
| UP | TNFR1 signaling pathway                                                   | 16212   | INOH         | 2.5E-02 | 2.1E-01 | DOWN | Endogenous TLR signaling                                               | 15845   | PID NCI      | 1.7E-02 | 1.8E-01 |
| UP | NOD-like receptor signaling pathway                                       | 8112    | KEGG         | 2.5E-02 | 2.2E-01 | DOWN | Signaling by FGFR                                                      | 13320   | REACTOME     | 1.3E-02 | 1.7E-01 |
| UP | Hiv-1 nef: negative effector of fas and trf                               | 4101    | PID BIOCARTA | 1.4E-02 | 1.5E-01 | DOWN | DAP12 interactions                                                     | 13004   | REACTOME     | 1.2E-02 | 1.7E-01 |
| UP | NOD1/2 Signaling Pathway                                                  | 13056   | REACTOME     | 1.3E-02 | 1.5E-01 | DOWN | Biosynthesis of unsaturated fatty acids                                | 488     | KEGG         | 9.8E-03 | 1.6E-01 |
| UP | Caspase-8 activation by cleavage                                          | 13394   | REACTOME     | 1.2E-02 | 1.3E-01 | DOWN | Staphylococcus aureus infection                                        | 10357   | KEGG         | 6.7E-03 | 1.5E-01 |
| UP | Dimerization of procaspase-8                                              | 13393   | REACTOME     | 1.2E-02 | 1.3E-01 | DOWN | Alpha4 beta1 integrin signaling events                                 | 15573   | PID NCI      | 4.6E-03 | 1.3E-01 |
| UP | Regulation by c-FLIP                                                      | 19810   | REACTOME     | 1.2E-02 | 1.3E-01 | DOWN | Tryptophan metabolism                                                  | 504     | KEGG         | 3.7E-03 | 1.2E-01 |
| UP | IL5-mediated signaling events                                             | 15680   | PID NCI      | 9.4E-03 | 1.2E-01 | DOWN | Retinoid metabolism and transport                                      | 13323   | REACTOME     | 1.3E-03 | 5.9E-02 |
| UP | IL3 signaling pathway                                                     | 3967    | PID BIOCARTA | 9.4E-03 | 1.2E-01 | DOWN | Cross-presentation of particulate exogenous antigens (phagosomes)      | 12984   | REACTOME     | 1.0E-03 | 4.9E-02 |
| UP | Internal ribosome entry pathway                                           | 3997    | PID BIOCARTA | 8.7E-03 | 1.2E-01 | DOWN | Integrin cell surface interactions                                     | 13303   | REACTOME     | 8.5E-04 | 4.3E-02 |
| UP | TRAF6 mediated NF-kB activation                                           | 13015   | REACTOME     | 7.2E-03 | 9.8E-02 | DOWN | Response to elevated platelet cytosolic Ca2+                           | 13131   | REACTOME     | 8.5E-04 | 4.3E-02 |
| UP | TNF signaling                                                             | 13410   | REACTOME     | 7.0E-03 | 9.8E-02 | DOWN | Phagosome                                                              | 10394   | KEGG         | 8.2E-04 | 4.6E-02 |
| UP | TRAIL signaling                                                           | 13411   | REACTOME     | 7.0E-03 | 9.8E-02 | DOWN | Beta3 integrin cell surface interactions                               | 15634   | PID NCI      | 5.9E-04 | 3.4E-02 |
| UP | Activation of IRF3/IRF7 mediated by TBK1/IKK epsilon                      | 13028   | REACTOME     | 6.7E-03 | 9.7E-02 | DOWN | Urokinase-type plasminogen activator (uPA) and uPAR-mediated signaling | 15219   | PID NCI      | 5.9E-04 | 3.4E-02 |
| UP | Trif1 signaling pathway                                                   | 4052    | PID BIOCARTA | 6.7E-03 | 9.7E-02 | DOWN | Extracellular matrix organization                                      | 17095   | REACTOME     | 5.4E-04 | 3.5E-02 |
| UP | The NLRP3 inflammasome                                                    | 13060   | REACTOME     | 6.7E-03 | 1.0E-01 | DOWN | Beta5 beta6 beta7 and beta8 integrin cell surface interactions         | 15811   | PID NCI      | 4.9E-04 | 3.4E-02 |
| UP | Caspase cascade in apoptosis                                              | 4166    | PID BIOCARTA | 5.7E-03 | 8.8E-02 | DOWN | Eicosanoid metabolism                                                  | 3989    | PID BIOCARTA | 4.7E-04 | 3.4E-02 |
| UP | Viral RNP Complexes in the Host Cell Nucleus                              | 13705   | REACTOME     | 5.6E-03 | 9.0E-02 | DOWN | Platelet degranulation                                                 | 13130   | REACTOME     | 4.5E-04 | 3.5E-02 |
| UP | Inflammasomes                                                             | 13061   | REACTOME     | 5.0E-03 | 8.3E-02 | DOWN | Hemostasis                                                             | 19956   | REACTOME     | 3.9E-04 | 3.2E-02 |
| UP | G2M2F-mediated signaling events                                           | 15598   | PID NCI      | 4.5E-03 | 7.7E-02 | DOWN | FGF signaling pathway                                                  | 15346   | PID NCI      | 3.5E-04 | 3.2E-02 |
| UP | TRIF-mediated programmed cell death                                       | 13029   | REACTOME     | 4.5E-03 | 7.8E-02 | DOWN | Syndecan interactions                                                  | 17559   | REACTOME     | 2.3E-04 | 2.2E-02 |
| UP | Toll Like Receptor 4 (TLR4) Cascade                                       | 13046   | REACTOME     | 4.0E-03 | 7.2E-02 | DOWN | Alpha8 beta1 integrin signaling events                                 | 15241   | PID NCI      | 1.2E-04 | 1.4E-02 |
| UP | Growth hormone signaling                                                  | 16149   | INOH         | 2.9E-03 | 5.3E-02 | DOWN | Beta1 integrin cell surface interactions                               | 14944   | PID NCI      | 1.0E-04 | 1.3E-02 |
| UP | TRAIL signaling pathway                                                   | 15206   | PID NCI      | 2.7E-03 | 5.0E-02 | DOWN | Valine Leucine Isoleucine degradation                                  | 16210   | INOH         | 8.2E-05 | 1.2E-02 |
| UP | TRAF3-dependent IRF activation pathway                                    | 13014   | REACTOME     | 2.6E-03 | 5.0E-02 | DOWN | Cell surface interactions at the vascular wall                         | 13112   | REACTOME     | 5.2E-05 | 8.7E-03 |
| UP | Adaptive Immune System                                                    | 18371   | REACTOME     | 2.5E-03 | 4.9E-02 | DOWN | Metabolism of lipids and lipoproteins                                  | 16920   | REACTOME     | 2.9E-05 | 5.7E-03 |
| UP | IL2                                                                       | 15918   | NETPATH      | 2.5E-03 | 4.9E-02 | DOWN | PPAR signaling pathway                                                 | 566     | KEGG         | 6.4E-06 | 1.5E-03 |
| UP | HIV-1 Nef: Negative effector of Fas and TNF-alpha                         | 15863   | PID NCI      | 2.4E-03 | 4.9E-02 | DOWN | Hematopoietic cell lineage                                             | 415     | KEGG         | 2.8E-06 | 8.1E-04 |
| UP | Negative regulators of RIG-I/MDA5 signaling                               | 13013   | REACTOME     | 2.4E-03 | 4.9E-02 | DOWN | Integrins in angiogenesis                                              | 15117   | PID NCI      | 2.6E-06 | 1.0E-03 |
| UP | IL27-mediated signaling events                                            | 15133   | PID NCI      | 2.4E-03 | 4.9E-02 | DOWN | Integrin family cell surface interactions                              | 15169   | PID NCI      | 2.6E-06 | 1.5E-03 |
| UP | MyD88-independent cascade                                                 | 13030   | REACTOME     | 2.1E-03 | 4.5E-02 | DOWN | Metabolism                                                             | 19429   | REACTOME     | 5.3E-08 | 6.2E-05 |
| UP | TRIF-mediated TLR3/TLR4 signaling                                         | 19507   | REACTOME     | 2.1E-03 | 4.5E-02 |      |                                                                        |         |              |         |         |
| UP | Toll Like Receptor 3 (TLR3) Cascade                                       | 13031   | REACTOME     | 2.1E-03 | 4.5E-02 |      |                                                                        |         |              |         |         |
| UP | Fas signaling pathway (cd95)                                              | 4088    | PID BIOCARTA | 2.0E-03 | 4.5E-02 |      |                                                                        |         |              |         |         |
| UP | FAS (CD95) signaling pathway                                              | 15900   | PID NCI      | 1.8E-03 | 4.3E-02 |      |                                                                        |         |              |         |         |
| UP | Trafficking and processing of endosomal TLR                               | 13047   | REACTOME     | 1.8E-03 | 4.2E-02 |      |                                                                        |         |              |         |         |
| UP | Caspase Cascade in Apoptosis                                              | 14995   | PID NCI      | 1.6E-03 | 3.8E-02 |      |                                                                        |         |              |         |         |
| UP | Oncostatin_M                                                              | 16513   | NETPATH      | 1.5E-03 | 3.7E-02 |      |                                                                        |         |              |         |         |
| UP | Induction of apoptosis through dr3 and dr4/5 death receptors              | 4039    | PID BIOCARTA | 1.4E-03 | 3.6E-02 |      |                                                                        |         |              |         |         |
| UP | Antiviral mechanism by IFN-stimulated genes                               | 17226   | REACTOME     | 1.4E-03 | 3.6E-02 |      |                                                                        |         |              |         |         |
| UP | ISG15 antiviral mechanism                                                 | 13075   | REACTOME     | 1.4E-03 | 3.6E-02 |      |                                                                        |         |              |         |         |
| UP | IL2-mediated signaling events                                             | 15044   | PID NCI      | 1.3E-03 | 3.5E-02 |      |                                                                        |         |              |         |         |
| UP | IL23-mediated signaling events                                            | 15427   | PID NCI      | 1.3E-03 | 3.5E-02 |      |                                                                        |         |              |         |         |
| UP | Activated TLR4 signalling                                                 | 19190   | REACTOME     | 1.3E-03 | 3.5E-02 |      |                                                                        |         |              |         |         |
| UP | NF-kB activation through FADD/RIP-1 pathway mediated by caspase-8 and -10 | 13016   | REACTOME     | 1.2E-03 | 3.4E-02 |      |                                                                        |         |              |         |         |
| UP | Trif2 signaling pathway                                                   | 4004    | PID BIOCARTA | 1.2E-03 | 3.4E-02 |      |                                                                        |         |              |         |         |
| UP | STING mediated induction of host immune responses                         | 13011   | REACTOME     | 1.0E-03 | 3.2E-02 |      |                                                                        |         |              |         |         |
| UP | EGFR1                                                                     | 15908   | NETPATH      | 1.0E-03 | 3.2E-02 |      |                                                                        |         |              |         |         |
| UP | Nucleotide-binding domain, (NLR) signaling pathways                       | 18305   | REACTOME     | 9.5E-04 | 3.1E-02 |      |                                                                        |         |              |         |         |
| UP | Activation of C3 and C5                                                   | 13049   | REACTOME     | 9.0E-04 | 3.0E-02 |      |                                                                        |         |              |         |         |
| UP | Cyclin A/B1 associated events during G2/M transition                      | 12973   | REACTOME     | 8.0E-04 | 2.7E-02 |      |                                                                        |         |              |         |         |
| UP | Regulation of innate immune responses to cytosolic DNA                    | 18110   | REACTOME     | 7.1E-04 | 2.5E-02 |      |                                                                        |         |              |         |         |
| UP | Toll-Like Receptors Cascades                                              | 17767   | REACTOME     | 6.7E-04 | 2.4E-02 |      |                                                                        |         |              |         |         |
| UP | Immunoregulatory interactions between a Lymphoid and a non-Lymphoid cell  | 13066   | REACTOME     | 6.6E-04 | 2.5E-02 |      |                                                                        |         |              |         |         |
| UP | RIP-mediated NFkB activation via ZBP1                                     | 13008   | REACTOME     | 5.8E-04 | 2.2E-02 |      |                                                                        |         |              |         |         |
| UP | Signaling by Interleukins                                                 | 18744   | REACTOME     | 4.7E-04 | 1.8E-02 |      |                                                                        |         |              |         |         |
| UP | Regulation of autophagy                                                   | 431     | KEGG         | 4.4E-04 | 1.8E-02 |      |                                                                        |         |              |         |         |
| UP | ZBP1(DAI) mediated induction of type I IFNs                               | 13010   | REACTOME     | 4.4E-04 | 1.9E-02 |      |                                                                        |         |              |         |         |
| UP | Chemokine receptors bind chemokines                                       | 13243   | REACTOME     | 4.3E-04 | 1.9E-02 |      |                                                                        |         |              |         |         |
| UP | Factors involved in megakaryocyte development and platelet production     | 13101   | REACTOME     | 3.3E-04 | 1.5E-02 |      |                                                                        |         |              |         |         |
| UP | KiRReceptor                                                               | 15910   | NETPATH      | 2.2E-04 | 1.1E-02 |      |                                                                        |         |              |         |         |
| UP | Chemokine signaling pathway                                               | 4389    | KEGG         | 1.7E-04 | 8.6E-03 |      |                                                                        |         |              |         |         |
| UP | Cytosolic sensors of pathogen-associated DNA                              | 19557   | REACTOME     | 9.7E-05 | 5.0E-03 |      |                                                                        |         |              |         |         |
| UP | Natural killer cell mediated cytotoxicity                                 | 578     | KEGG         | 8.4E-05 | 4.5E-03 |      |                                                                        |         |              |         |         |
| UP | Autoimmune thyroid disease                                                | 2799    | KEGG         | 5.4E-05 | 3.1E-03 |      |                                                                        |         |              |         |         |
| UP | Death Receptor Signaling                                                  | 19890   | REACTOME     | 2.7E-05 | 1.6E-03 |      |                                                                        |         |              |         |         |
| UP | Extrinsic Pathway for Apoptosis                                           | 17266   | REACTOME     | 2.7E-05 | 1.6E-03 |      |                                                                        |         |              |         |         |
| UP | Growth hormone receptor signaling                                         | 13072   | REACTOME     | 1.4E-05 | 9.4E-04 |      |                                                                        |         |              |         |         |
| UP | JAK-STAT pathway and regulation                                           | 16125   | INOH         | 3.3E-07 | 2.3E-05 |      |                                                                        |         |              |         |         |
| UP | Toll-like receptor signaling pathway                                      | 564     | KEGG         | 9.6E-08 | 7.2E-06 |      |                                                                        |         |              |         |         |
| UP | IFN alpha signaling                                                       | 16239   | INOH         | 3.4E-08 | 2.7E-06 |      |                                                                        |         |              |         |         |
| UP | Interferon gamma signaling                                                | 13077   | REACTOME     | 1.4E-08 | 1.2E-06 |      |                                                                        |         |              |         |         |
| UP | Hepatitis C                                                               | 10404   | KEGG         | 1.4E-08 | 1.3E-06 |      |                                                                        |         |              |         |         |
| UP | Regulation of IFNA signaling                                              | 13073   | REACTOME     | 9.0E-09 | 8.9E-07 |      |                                                                        |         |              |         |         |
| UP | Cytosolic DNA-sensing pathway                                             | 8117    | KEGG         | 5.5E-09 | 6.0E-07 |      |                                                                        |         |              |         |         |
| UP | TRAF6 mediated IRF7 activation                                            | 13012   | REACTOME     | 1.1E-09 | 1.3E-07 |      |                                                                        |         |              |         |         |
| UP | Innate Immune System                                                      | 17476   | REACTOME     | 3.6E-10 | 4.8E-08 |      |                                                                        |         |              |         |         |
| UP | RIG-I/MDA5 mediated induction of IFN-alpha/beta pathways                  | 13017   | REACTOME     | 2.8E-11 | 4.1E-09 |      |                                                                        |         |              |         |         |
| UP | Jak-STAT signaling pathway                                                | 568     | KEGG         | 1.4E-11 | 2.4E-09 |      |                                                                        |         |              |         |         |
| UP | Cytokine-cytokine receptor interaction                                    | 515     | KEGG         | 7.2E-12 | 1.4E-09 |      |                                                                        |         |              |         |         |
| UP | RIG-I-like receptor signaling pathway                                     | 5713    | KEGG         | 1.6E-12 | 3.8E-10 |      |                                                                        |         |              |         |         |
| UP | Immune System                                                             | 18444   | REACTOME     | 1.6E-20 | 4.8E-18 |      |                                                                        |         |              |         |         |
| UP | Interferon Signaling                                                      | 18059   | REACTOME     | 5.0E-21 | 2.0E-18 |      |                                                                        |         |              |         |         |
| UP | Interferon alpha/beta signaling                                           | 13074   | REACTOME     | 1.2E-23 | 7.3E-21 |      |                                                                        |         |              |         |         |
| UP | Cytokine Signaling In Immune system                                       | 17418   | REACTOME     | 2.7E-24 | 3.2E-21 |      |                                                                        |         |              |         |         |

Supplemental Table 8

|              | Subject                   | CMV-00A            | CMV-00B          | CMV-00C             | CMV-00D            | <i>in vitro</i> |
|--------------|---------------------------|--------------------|------------------|---------------------|--------------------|-----------------|
|              | VL (IU/ml)<br>days lapsed | 58,900 → 562<br>47 | 147 → 1500<br>49 | 366,000 → 238<br>28 | 55,000 → 137<br>35 | NA<br>1         |
| Viral PRR    | DHX58                     |                    | 2.07             | 1.66                | 3.89               | +               |
|              | DDX58                     | 1.83               | 4.95             |                     | 5.36               |                 |
|              | IFIH1                     | 1.72               | 3.05             | 1.87                | 8.26               |                 |
|              | ZBP1                      | 1.78               | 1.57             | 2.09                | 4.07               |                 |
|              | NOD1                      |                    |                  | 0.64                | 3.67               |                 |
|              | NOD2                      |                    |                  |                     | 1.74               |                 |
| Fungal PRR   | CD14                      |                    | 0.86             | 1.56                | 1.18               | -               |
|              | CD36                      | 0.85               |                  | 1.19                | 1.21               |                 |
|              | ITGB2                     |                    | 0.98             | 1.011000037         | 1.07               |                 |
|              | ITGAM                     | 0.76               |                  | 1.133000016         |                    |                 |
|              | STAB1                     | 0.61               |                  |                     | 1.21               |                 |
| Inflammasome | AIM2                      | 3.29               | 5.93             | 1.508000016         | 11.82              | +               |
|              | IFI16                     | 1.52               | 2.49             | 0.750999987         | 2.65               |                 |
|              | MEFV                      | 1.09               | 1.74             | 0.833000004         | 1.70               |                 |
|              | CASP1                     |                    | 1.30             | 0.867999971         | 1.59               |                 |
|              | CASP4                     |                    | 1.48             | 0.818000019         | 1.53               |                 |
| Rejection    | CXCL11                    |                    |                  |                     | 12.50              | +               |
|              | CCL8                      |                    |                  |                     |                    |                 |
|              | IDO1                      | 7.25               |                  |                     | 11.92              |                 |
|              | WARS                      | 1.24               | 1.36             | 1.02                | 1.05               |                 |
|              | TAP1                      | 1.57               | 1.73             | 1.67                | 3.01               |                 |
| ISG          | MX1                       | 1.19               | 2.92             | 2.77                | 5.47               | +               |
|              | MX2                       | 1.23               | 2.06             | 1.44                | 3.44               |                 |
|              | EIF2AK2                   | 1.14               | 1.92             | 2.49                | 2.57               |                 |
|              | OAS1                      | 1.47               | 2.44             | 1.21                | 4.04               |                 |
|              | IRF7                      | 1.21               | 1.73             | 2.15                | 3.09               |                 |
